# Supplementary material
Source: Springer Nature journal article supplement (https://www.springermedizin.de/resource/supplementary/13014_2012_621_MOESM1_ESM.pdf/9634156)

a.

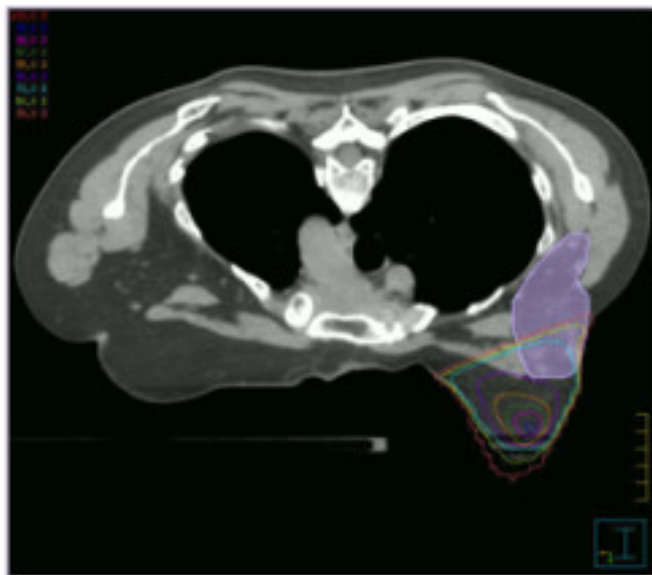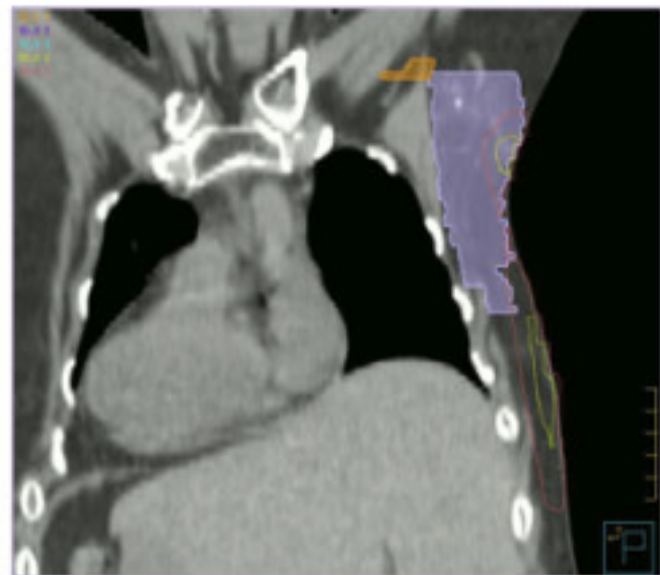

b.

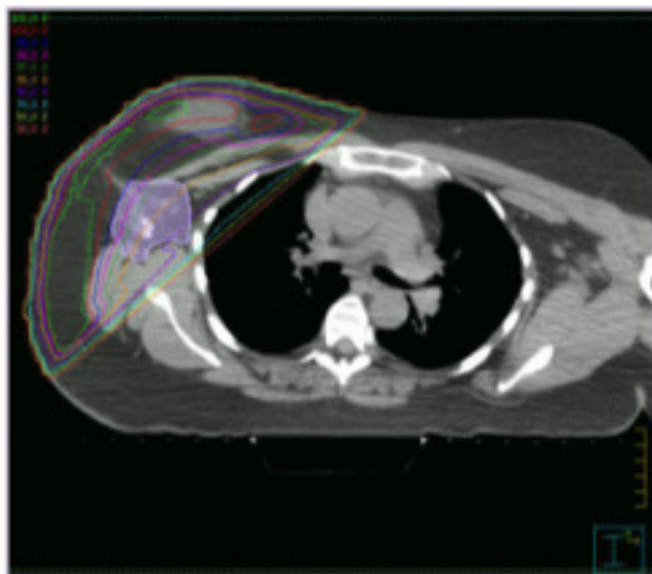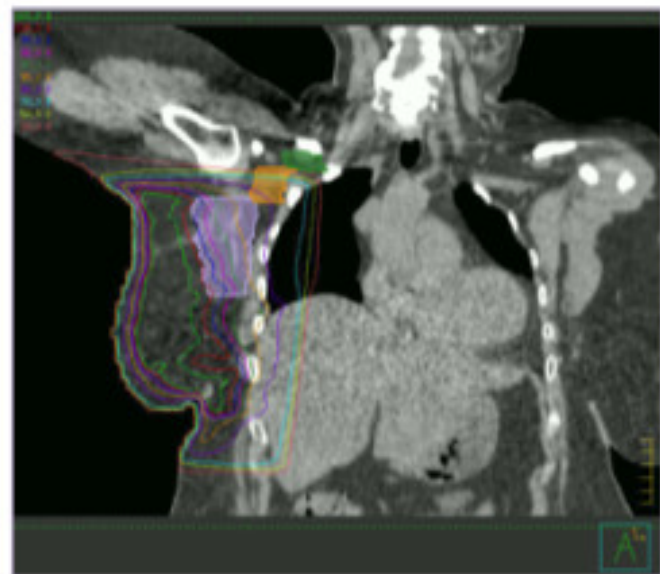

Supplement: MOESM1 [file 9634156]
